# Supplementary material for: Vanadium Nitride Nanoparticles Grown on Carbon Fiber Cloth as an Advanced Binder-Free Anode for the Storage of Sodium and Potassium Ions
Source: MDPI journal article supplement (doi:10.3390/ma16175820), 2023-08-25
Supplement: s1 [file s1]

# Supporting information

## Vanadium Nitride Nanoparticles Grown on Carbon Fiber Cloth as an Advanced Binder-Free Anode for the Storage of Sodium and Potassium Ions

Yiwei Qin<sup>1</sup>, Haimin Zhang<sup>2</sup>, Yanghe Jiachen<sup>3</sup>, Jing Yang<sup>3</sup>, Wei Li<sup>4</sup>, Xiaojun Zhao<sup>1\*</sup>, Sainan Liu<sup>3\*</sup>

<sup>1</sup>*School of Materials Science and Engineering, Central South University, Changsha 410083, China;*

*yiweiqin.csu@foxmail.com*

<sup>2</sup>*Hunan Zoomlion Neo Material Technology Co., Ltd., Changsha 410083, China;*

*zhanghaimin@csu.edu.cn*

<sup>3</sup>*School of Minerals Processing and Bioengineering, Central South University, Changsha 410083,*

*China; 8204211522@csu.edu.cn (Y.J.); 215612104@csu.edu.cn (J.Y.)*

<sup>4</sup>*Powder Metallurgy Research Institute, Central South University, Changsha 410083, China;*

*csuliw@csu.edu.cn*

*\*Correspondence: zhaoxj@csu.edu.cn (X.Z.); lsn@csu.edu.cn (S.L.)*

### LIST OF CONTENTS

**Fig. S1.** Comparison of SEM morphology of (a, b) commercial and (c, d) treated carbon.

**Fig. S2.** SEM micrographs of (a, b) VN powder precursor, (c, d) VN powder, (e) HAADF images and corresponding elemental mapping distribution of VN.

**Fig. S3.** High-resolution O 1s spectra recorded for the VN/CFC composite material.

**Fig. S4.** CV curve of VN powder anode at a scan rate of 0.1 mV s<sup>-1</sup> between 0.01 and 3 V.

**Fig. S5.** Galvanostatic charge-discharge curves of VN-based anodes at 0.1 A g<sup>-1</sup> rate.

**Fig. S6.** Cycle performance of CFC for SIBs and PIBs at  $0.1 \text{ A g}^{-1}$  current density.

**Fig. S7.** The ex-situ SEM images of VN/CFC electrode after 10 cycles at a current density of  $0.5 \text{ A g}^{-1}$ .

**Fig. S8.** Nyquist plots of VN powder and VN/CFC as the anode materials for SIBs before cycling.

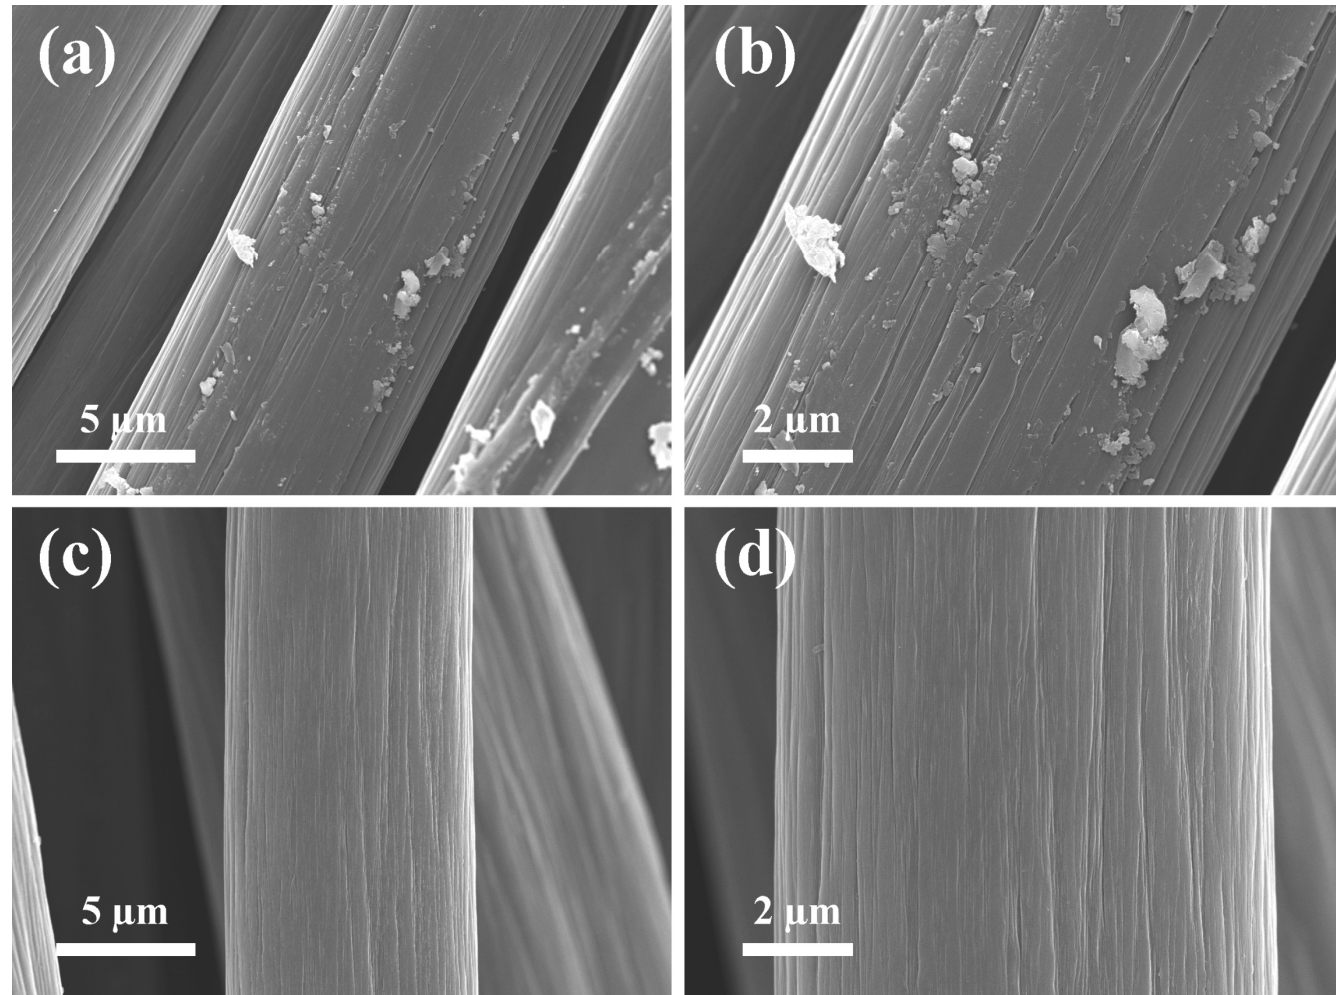

**Fig. S1.** Comparison of SEM morphology of (a, b) commercial and (c, d) treated carbon cloth.

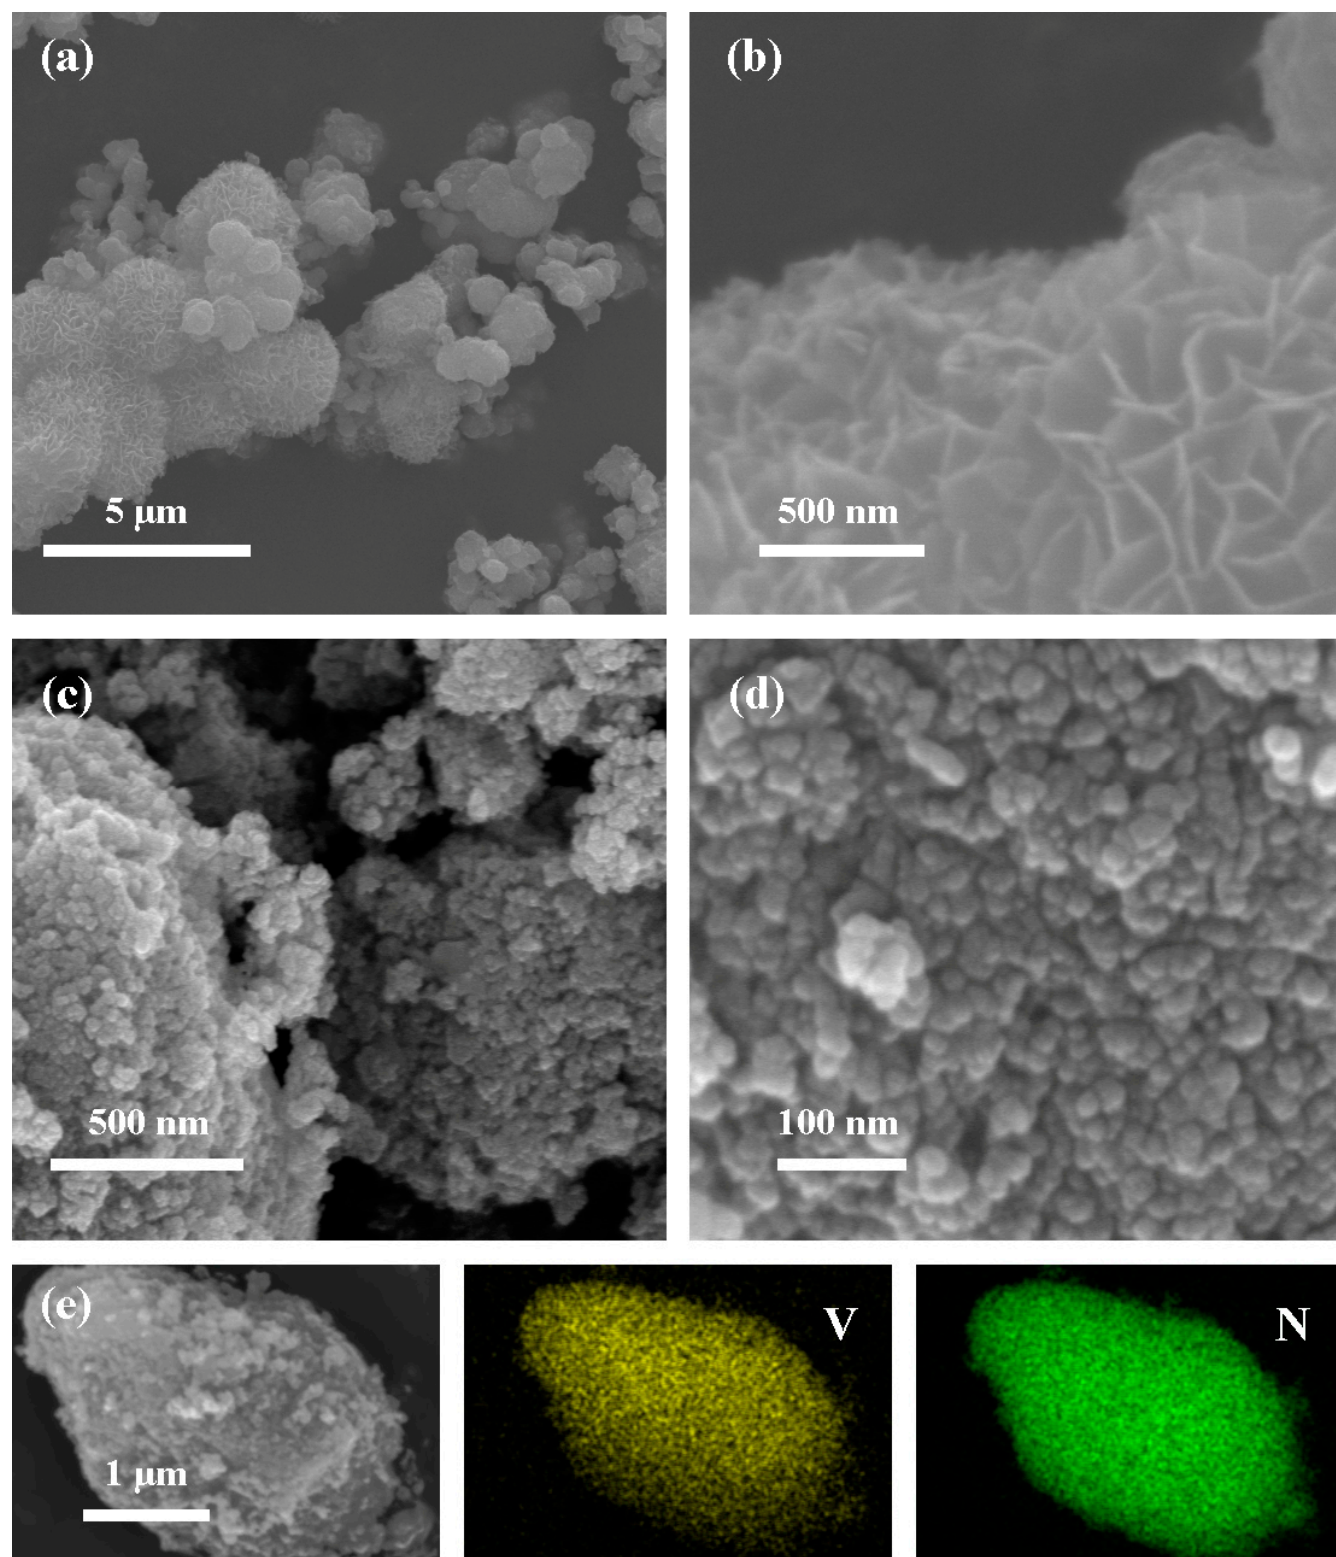

**Fig. S2.** SEM micrographs of (a, b) VN precursor, (c, d) VN, (e) HAADF images and corresponding elemental mapping distribution of VN.

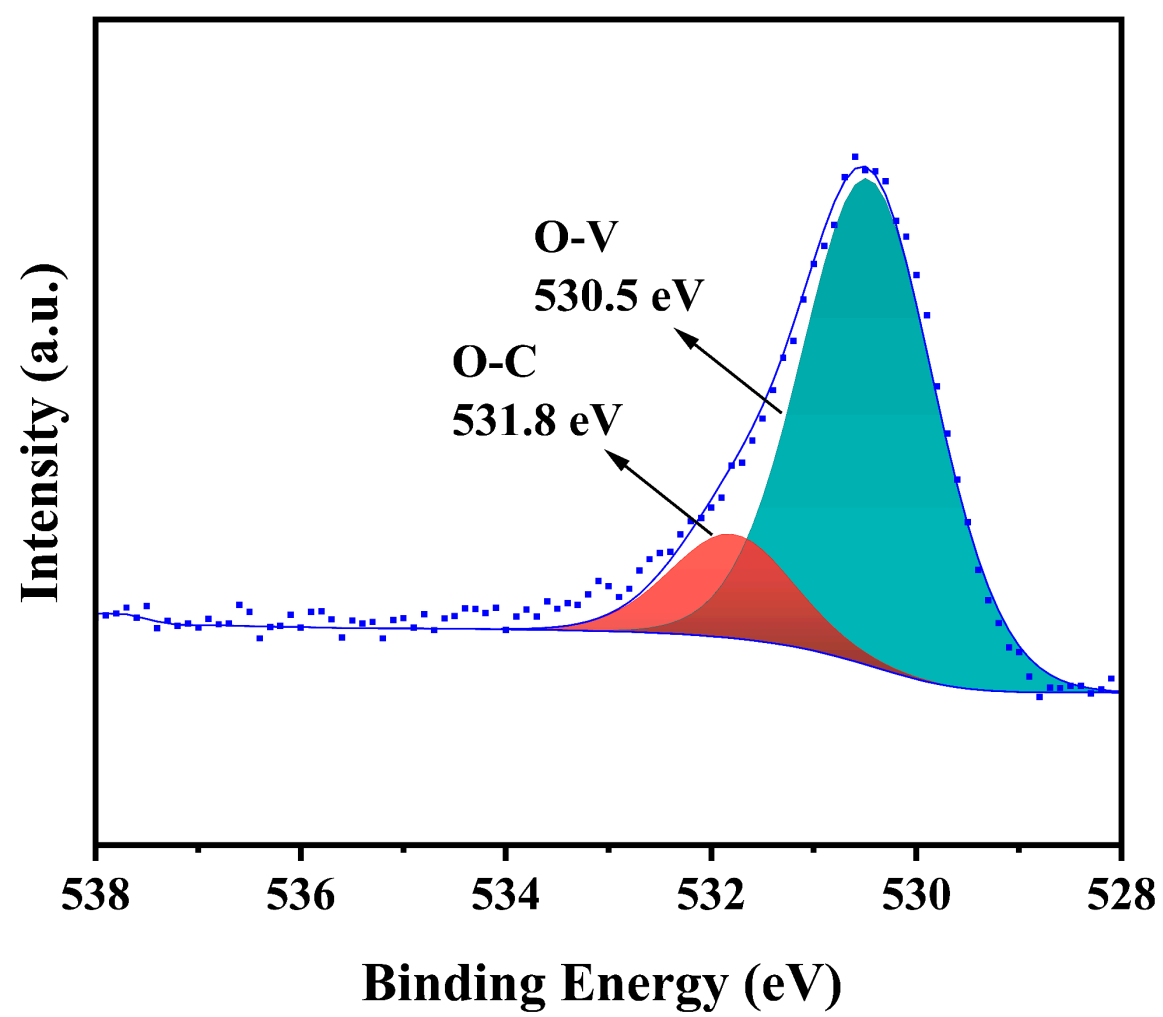

**Fig. S3.** High-resolution O 1s spectra recorded for the VN/CFC composite material.

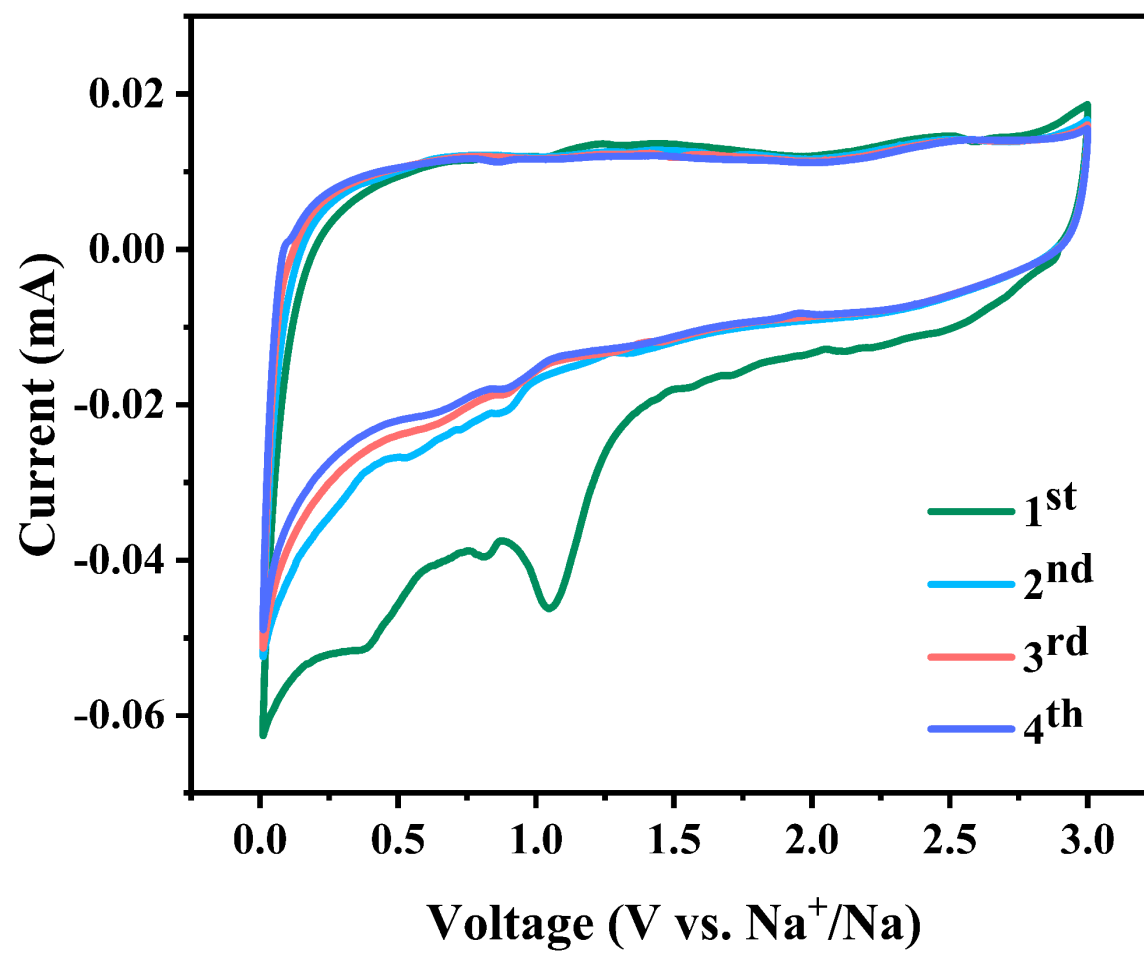

**Fig. S4.** CV curve of VN at a scan rate of 0.1 mV s<sup>-1</sup> between 0.01 and 3 V.

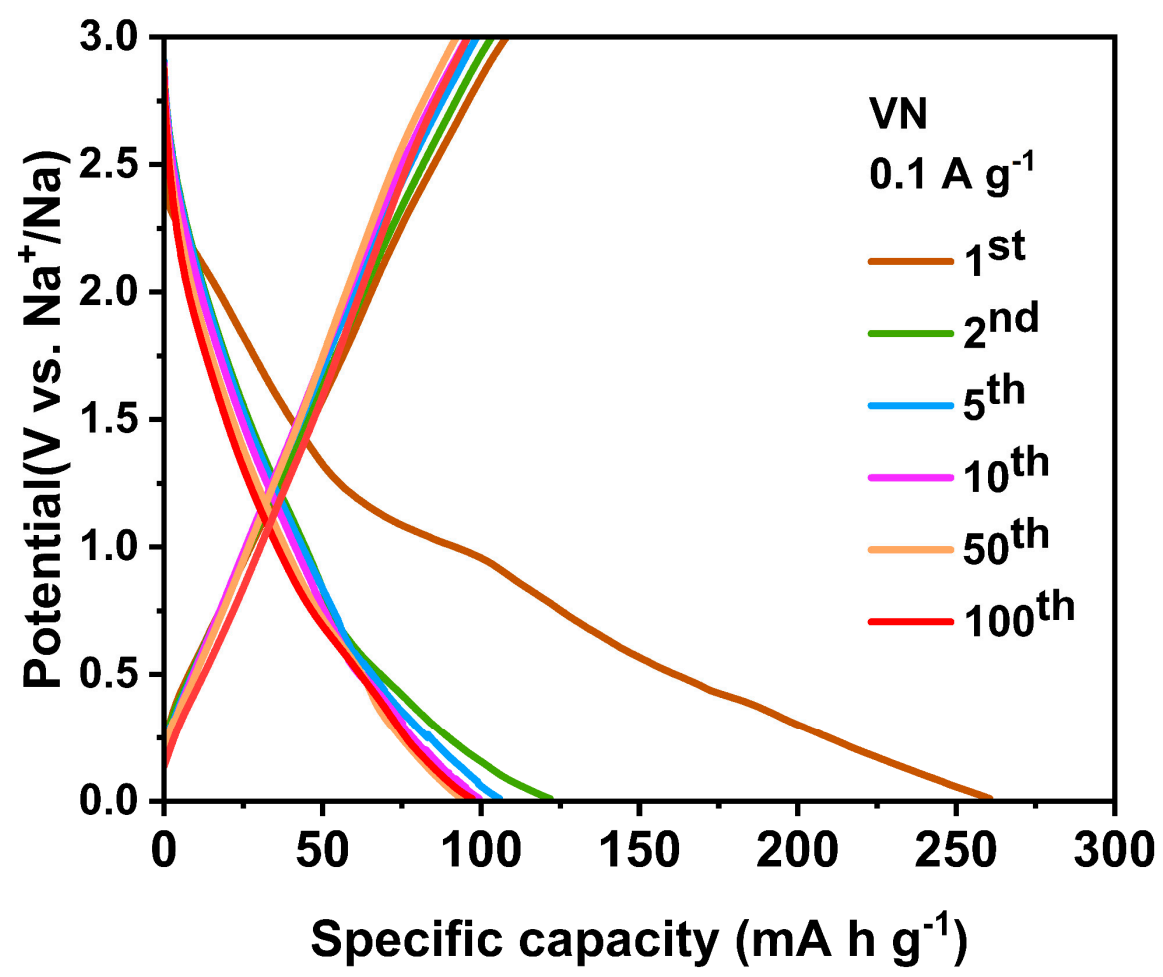

Fig. S5. Galvanostatic charge-discharge curves of VN-based anodes at 0.1 A g<sup>-1</sup> rate.

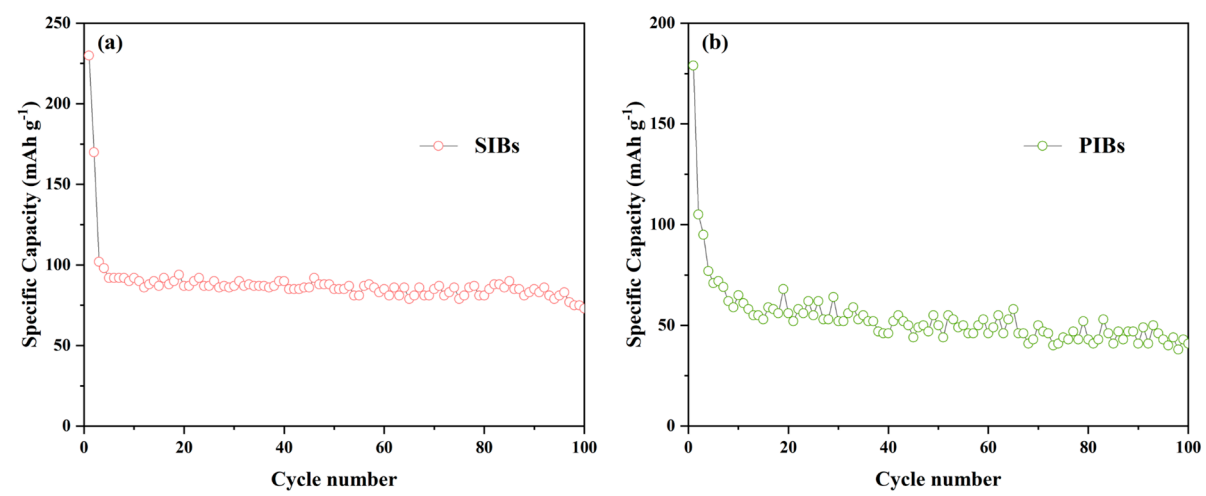

**Fig. S6.** Cycle performance of CFC for SIBs and PIBs at 0.1 A g<sup>-1</sup> current density.

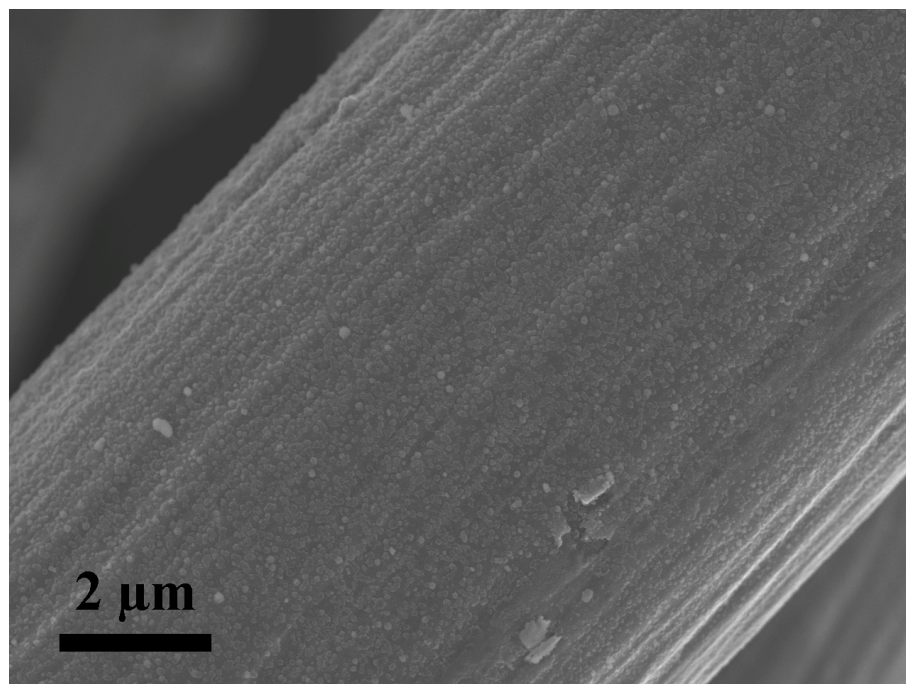

**Fig. S7.** The ex-situ SEM images of VN/CFC electrode after 10 cycles at a current density of  $0.5 \text{ A g}^{-1}$ .



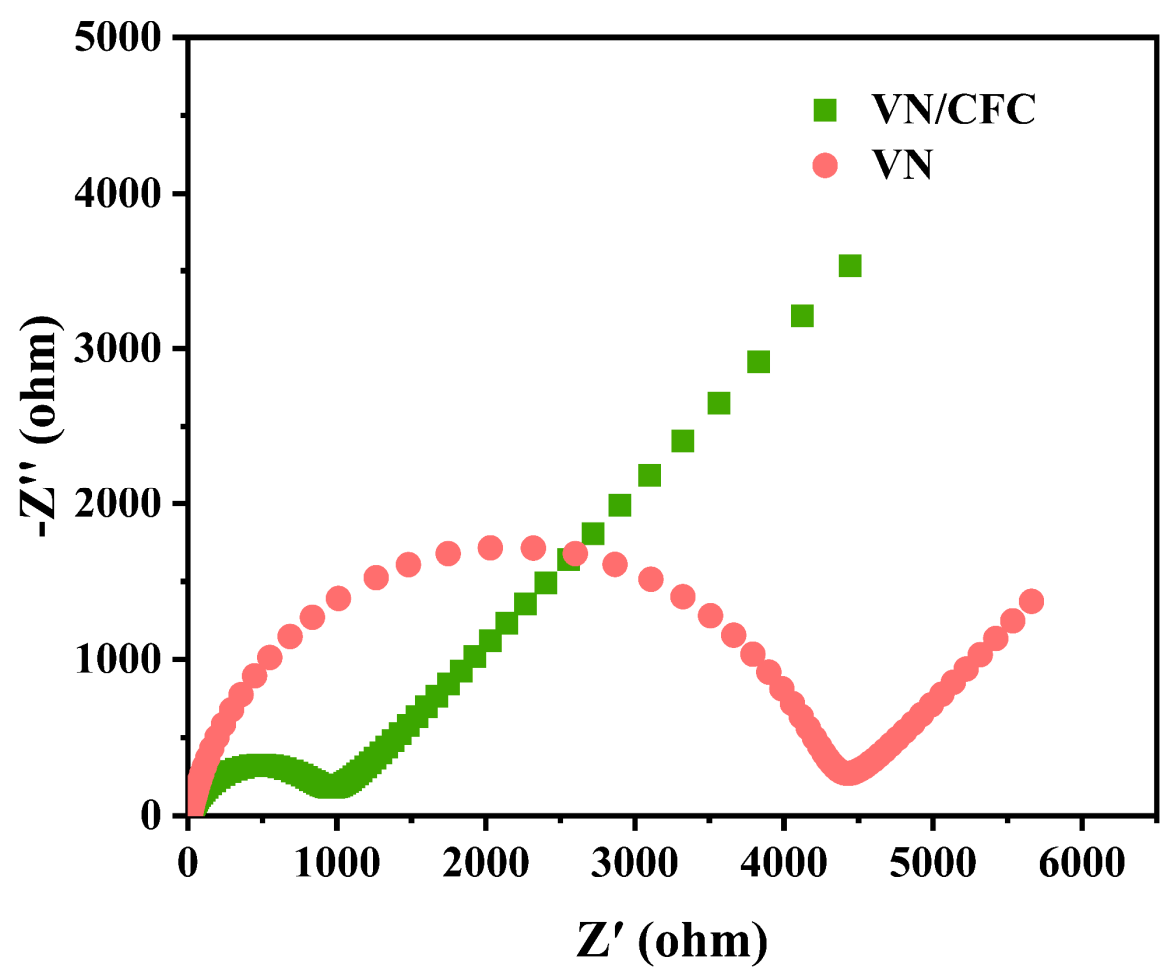

**Fig. S8.** Nyquist plots of VN and VN/CFC as the anode materials for SIBs before cycling.
